# Supplementary material for: One-step synthesis of polysubstituted benzene derivatives by multi-component cyclization of α-bromoacetate, malononitrile and aromatic aldehydes
Source: Royal Society of Chemistry journal article supplement (doi:10.1039/b718171j), 2008-01-01

**One-step synthesis of polysubstituted benzenes by multi-component cyclization  
of  $\alpha$ -bromoacetate, malonitrile and aromatic aldehydes**

Chao Guo Yan,\* Xiao Kai Song, Qi Fang Wang, Jing Sun

*College of Chemistry & Chemical Engineering, Yangzhou University, Yangzhou 225002, China*

Ulrich Siemeling,\* Clemens Bruhn

*Institute of Chemistry, University of Kassel, Heinrich-Plett-Strasse 40, D-34132 Kassel, Germany*

## Supporting Information

### Figures

|                  |          |
|------------------|----------|
| <b>Figure 1</b>  | <b>2</b> |
| <b>Figure 2</b>  | <b>2</b> |
| <b>Figure 3</b>  | <b>3</b> |
| <b>Figure 4</b>  | <b>3</b> |
| <b>Scheme1-2</b> | <b>4</b> |

### General Experimental Methods and

**Characterization of compounds** **5-21**

**X-Ray Crystallographic Data** **CIF in separate file.**

Crystallographic data (**1a**: CCDC 663309; **1b**: CCDC 663310; **1c**: CCDC 663311; **1h** CCDC 663312. **D1**: CCDC 663313; **D2**: CCDC 663314. **F** CCDC 663315. ) have been deposited at the Cambridge Crystallographic Database Centre and is available on request from the Director, CCDC, 12 Union Road, Cambridge, CB2 1EZ, UK (Fax: +44-1223-336033; e-mail: [deposit@ccdc.cam.ac.uk](mailto:deposit@ccdc.cam.ac.uk) or [www:http//www.ccdc.cam.ac.uk](http://www.ccdc.cam.ac.uk)).

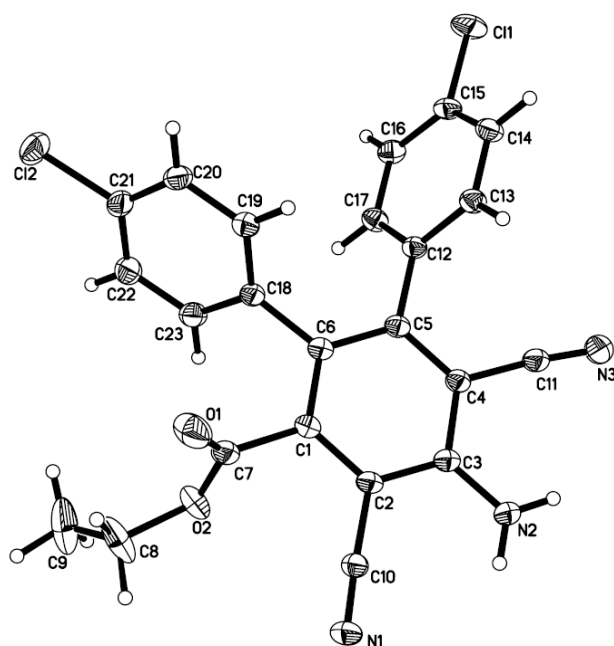

Figure 1 Molecular structure of **1c** in the crystal

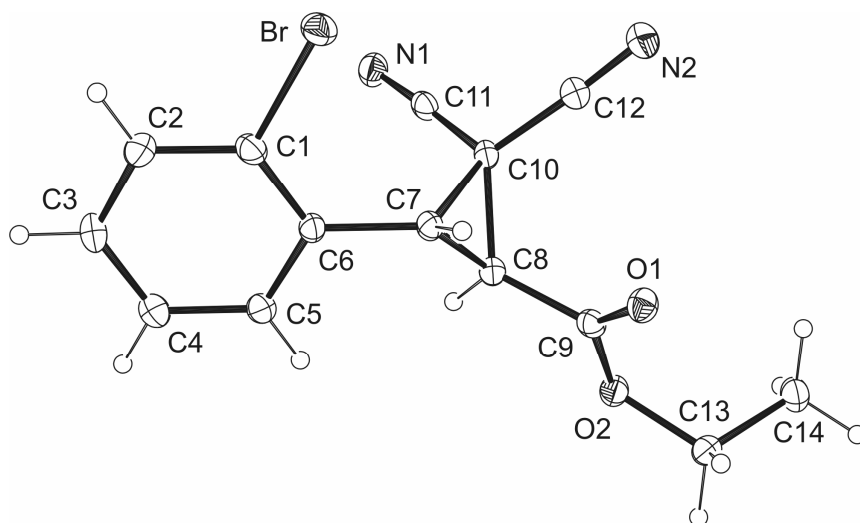

Figure 2 Molecular structure of cyclopropane derivative **D2** in the crystal

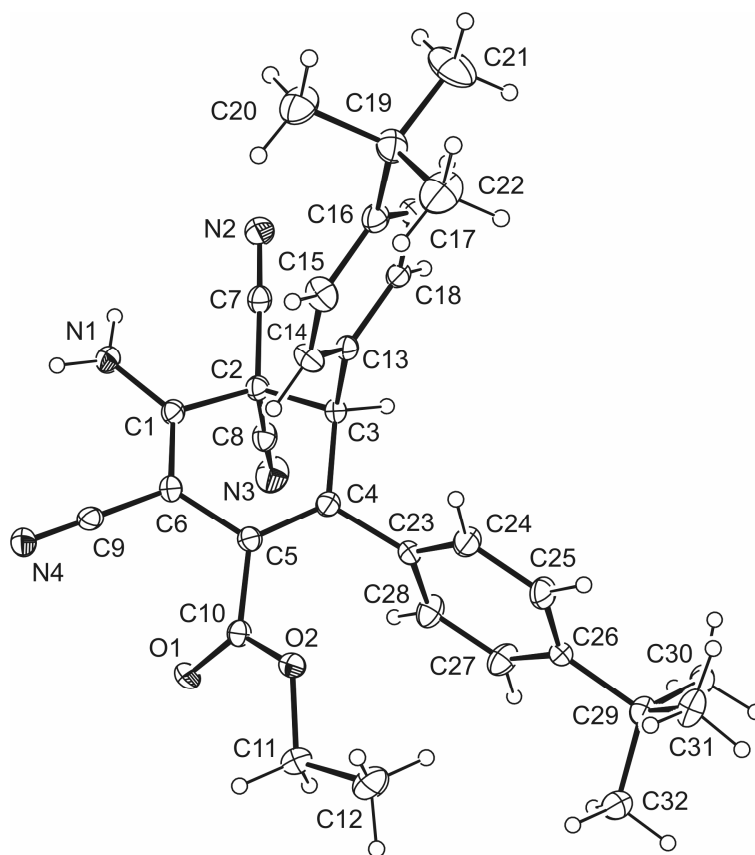

**Figure 3** Molecular structure of intermediate **F** in the crystal

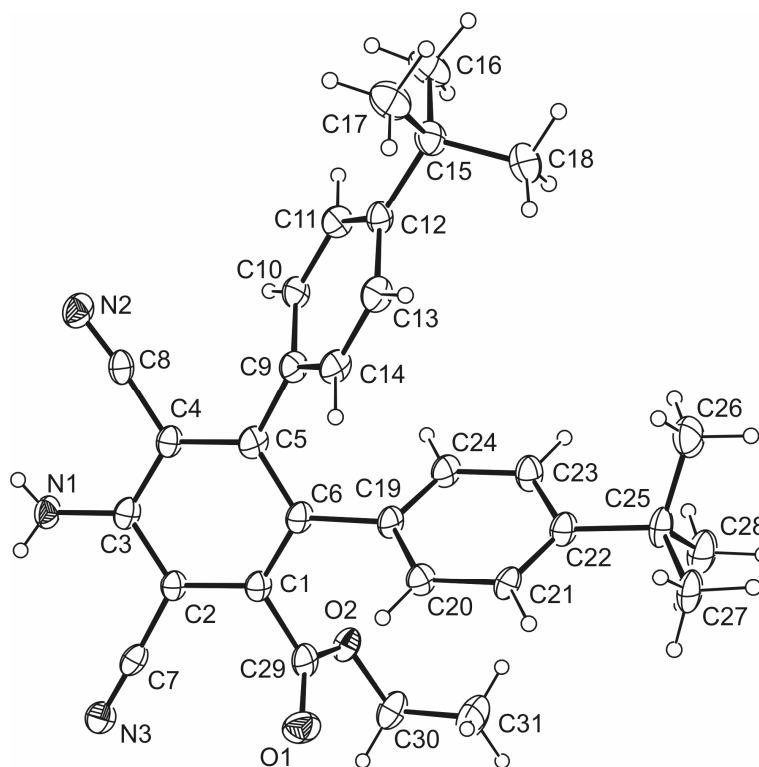

**Figure 4** Molecular structure of **1h** in the crystal

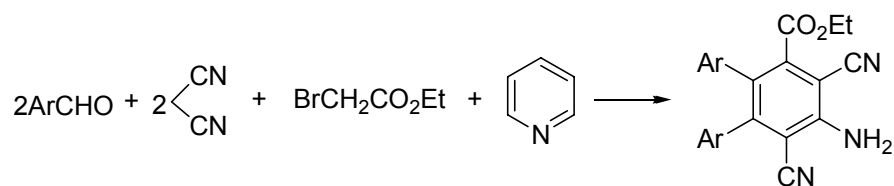

**Scheme 1** One-pot four-component reaction affording polysubstituted benzene derivatives

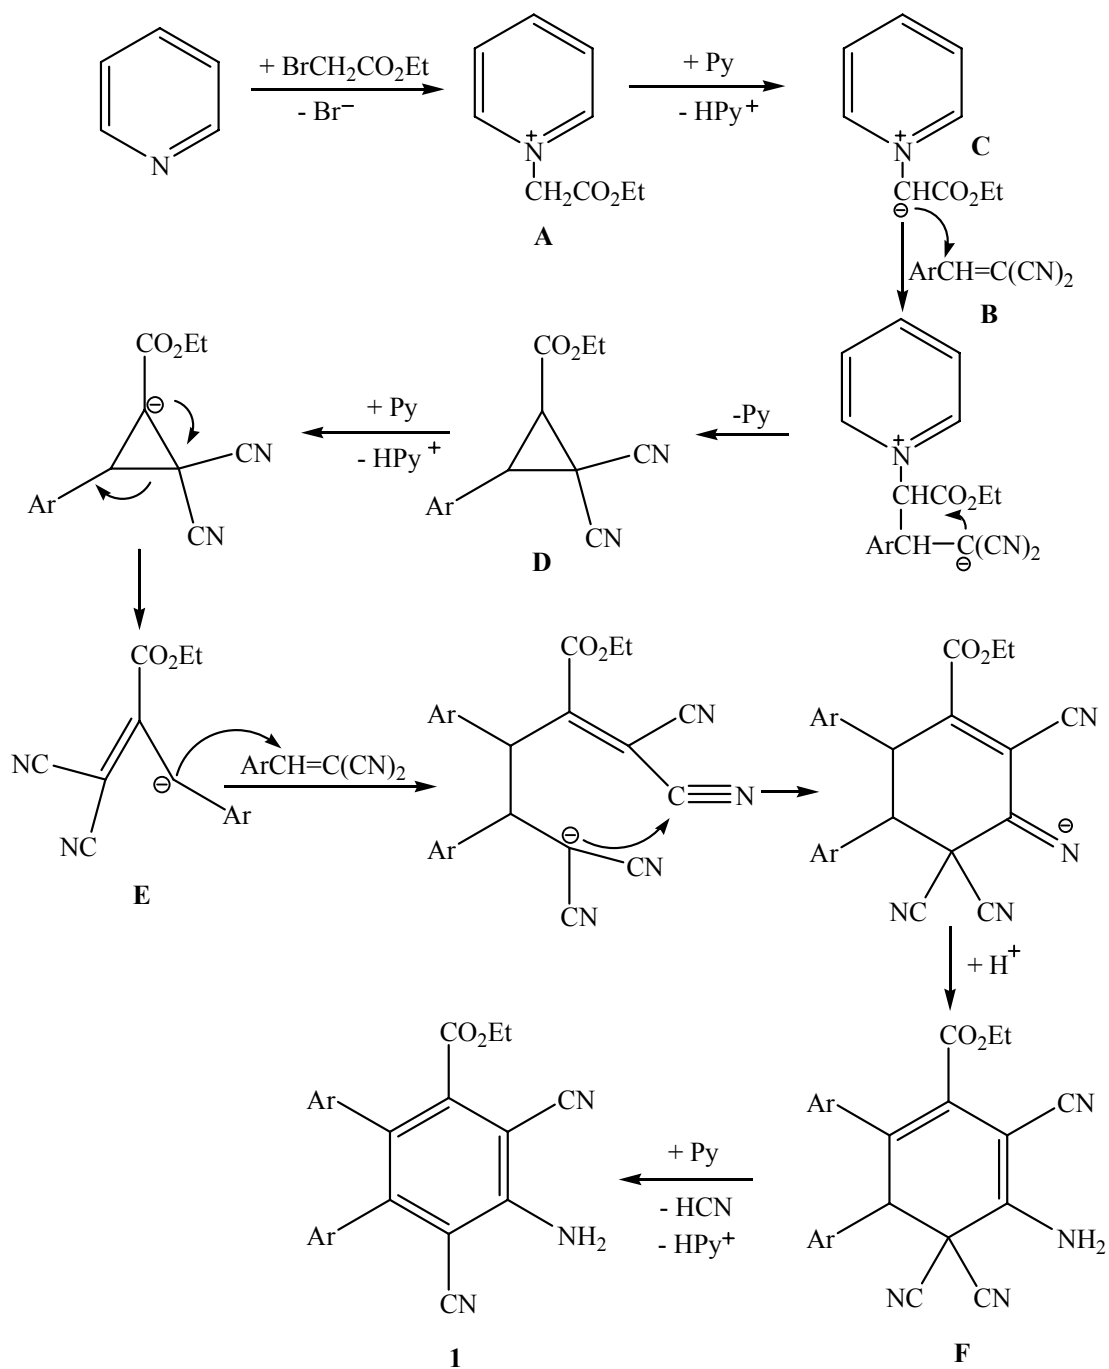

**Scheme 2** Proposed mechanism for the formation of polysubstituted benzenes **1**

### General procedure for the synthesis of polysubstituted Benzenes

A mixture of pyridine (20.0mmol, 1.58g), ethyl  $\alpha$ -bromoacetate (4.0mmol, 0.668g), aromatic aldehyde (4.0mmol, 0.562g) and malononitrile (4.0mmol, 0.264g) in acetonitrile (20mL) was refluxed for 12 hours. The solvent was removed by evaporation and the residue was titrated with ethanol (10mL) to give the crude product, which is recrystallized in ethanol to give light yellow solid

**1a:** mp151~152 $^{\circ}$ .  $^1\text{H}$  NMR ( $\text{CDCl}_3$ , 600 MHz)  $\delta$ (ppm) 7.273 (m,  $J = 8.4\text{Hz}$ , 3H,  $\text{C}_6\text{H}_5$ ), 7.132 (m,  $J = 7.2\text{ Hz}$ , 3H,  $\text{C}_6\text{H}_5$ ), 7.054 (d,  $J = 8.4\text{ Hz}$ , 2H,  $\text{C}_6\text{H}_5$ ), 6.921 (d,  $J = 8.4\text{ Hz}$ , 2H,  $\text{C}_6\text{H}_5$ ), 5.380 (s, 2H,  $\text{NH}_2$ ), 4.082 (q,  $J = 7.2\text{ Hz}$ , 2H,  $\text{CH}_2$ ), 0.972 (t,  $J = 7.2\text{ Hz}$ , 3H,  $\text{CH}_3$ );  $^{13}\text{C}$  NMR ( $\text{CDCl}_3$ , 600 MHz)  $\delta$ (ppm) 147.81, 147.48, 146.97, 131.34, 131.14, 128.82, 127.86, 127.24, 126.55, 124.80, 124.52, 124.23, 109.93, 38.44, 34.54, 34.13, 27.43, 27.05, 19.78; IR(KBr)  $\nu$  3432, 3355, 3254, 2220, 1727, 1648, 1565, 1568, 1454, 1374, 1267, 1231, 1034, 754, 703; Found: C,75.15; H,4.47; N,11.39.  $\text{C}_{23}\text{H}_{17}\text{N}_3\text{O}_2$  requires C,75.19; H,4.66; N,11.44. The structure of **1a** was further proved by X-ray crystallographic analysis (Figure 1).

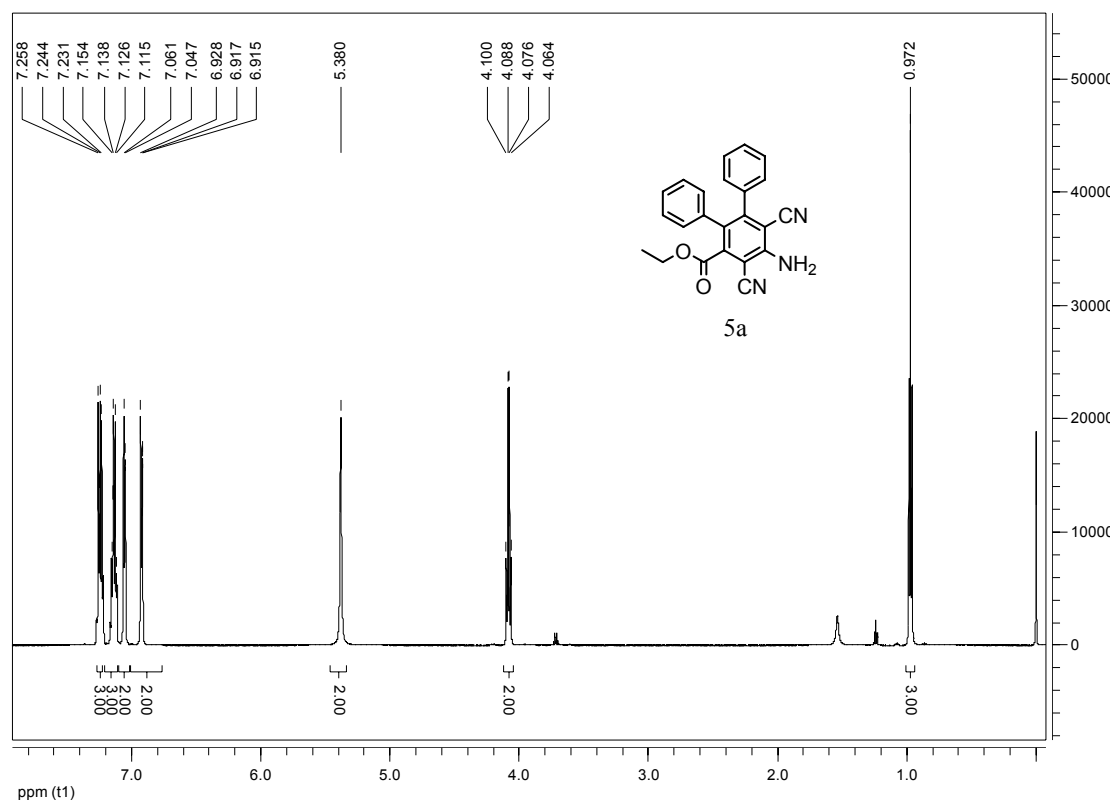

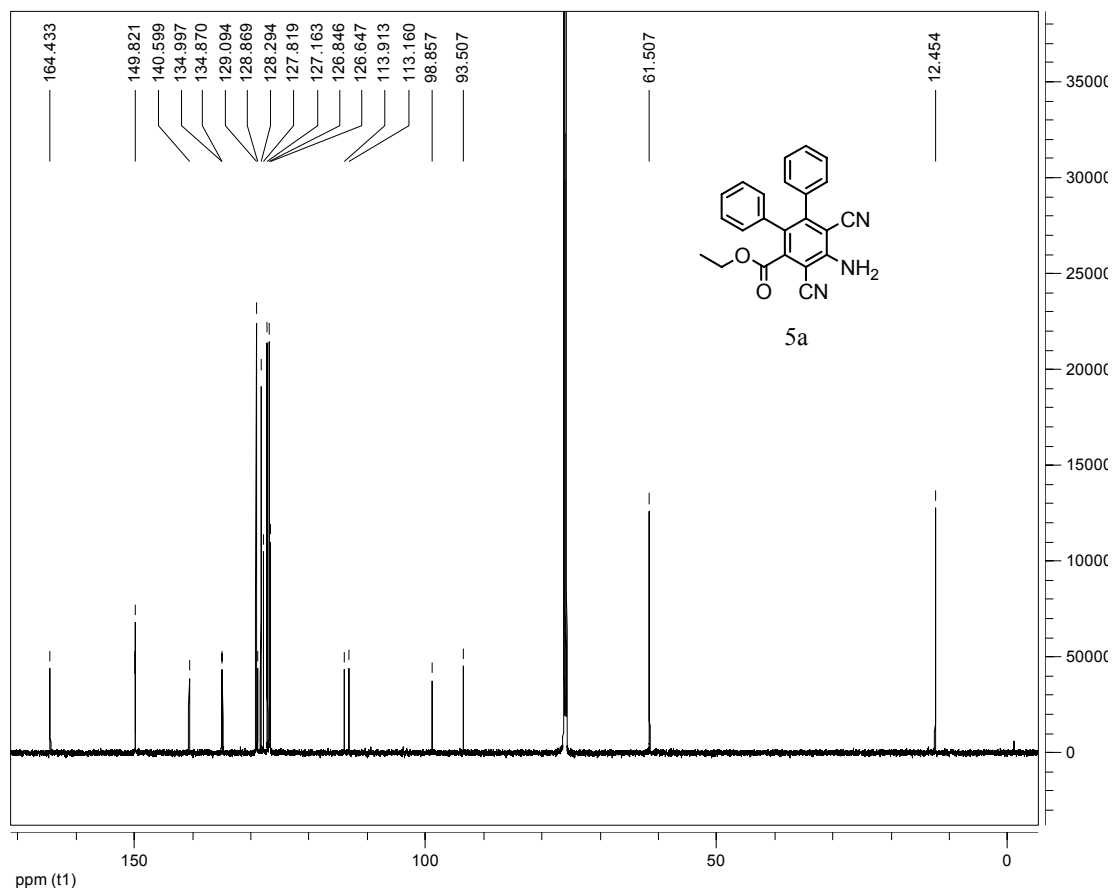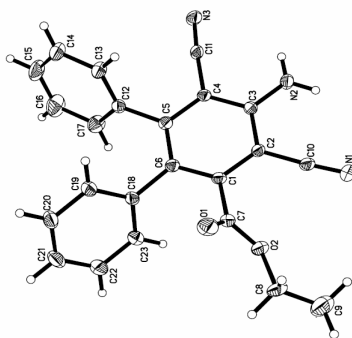

**Figure 1** X-ray crystallographic structure of **1a**

**1b** mp190~191°.  $^1\text{H}$  NMR ( $\text{CDCl}_3$ , 600 MHz)  $\delta$  7.049 (d,  $J = 7.8$  Hz, 2H,  $p\text{-CH}_3\text{C}_6\text{H}_4$ ), 6.942 (d,  $J = 7.8$  Hz, 4H,  $p\text{-CH}_3\text{C}_6\text{H}_4$ ), 6.801 (d,  $J = 7.8$  Hz, 2H,  $p\text{-CH}_3\text{C}_6\text{H}_4$ ) 5.342 (s, 2H,  $\text{NH}_2$ ), 4.103 (q,  $J = 7.2$  Hz, 2H,  $\text{CH}_2$ ), 2.292 (s, 3H,  $\text{CH}_3$ ), 2.251 (s, 3H,  $\text{CH}_3$ ), 0.972 (t,  $J = 7.2$  Hz, 3H,  $\text{CH}_3$ );  $^{13}\text{C}$  NMR ( $\text{CDCl}_3$ , 600 MHz)  $\delta$ (ppm) 164.23, 150.18, 148.60, 140.93, 134.66, 133.42, 133.29, 133.25, 130.57, 129.80, 128.02, 127.59, 113.79, 113.04, 96.97, 94.24, 61.57, 12.74; IR(KBr)  $\nu$  3467,

3356, 3256, 2225, 1741, 1640, 1588, 1560, 1449, 1376, 1266, 1232, 1031, 795, 762;

Found: C,76.12; H,5.11; N,10.60. C<sub>25</sub>H<sub>21</sub>N<sub>3</sub>O<sub>2</sub> requires C,75.93; H,5.35; N,10.63.

The structure of 5b was further proved by X-ray crystallographic analysis (Figure 2).

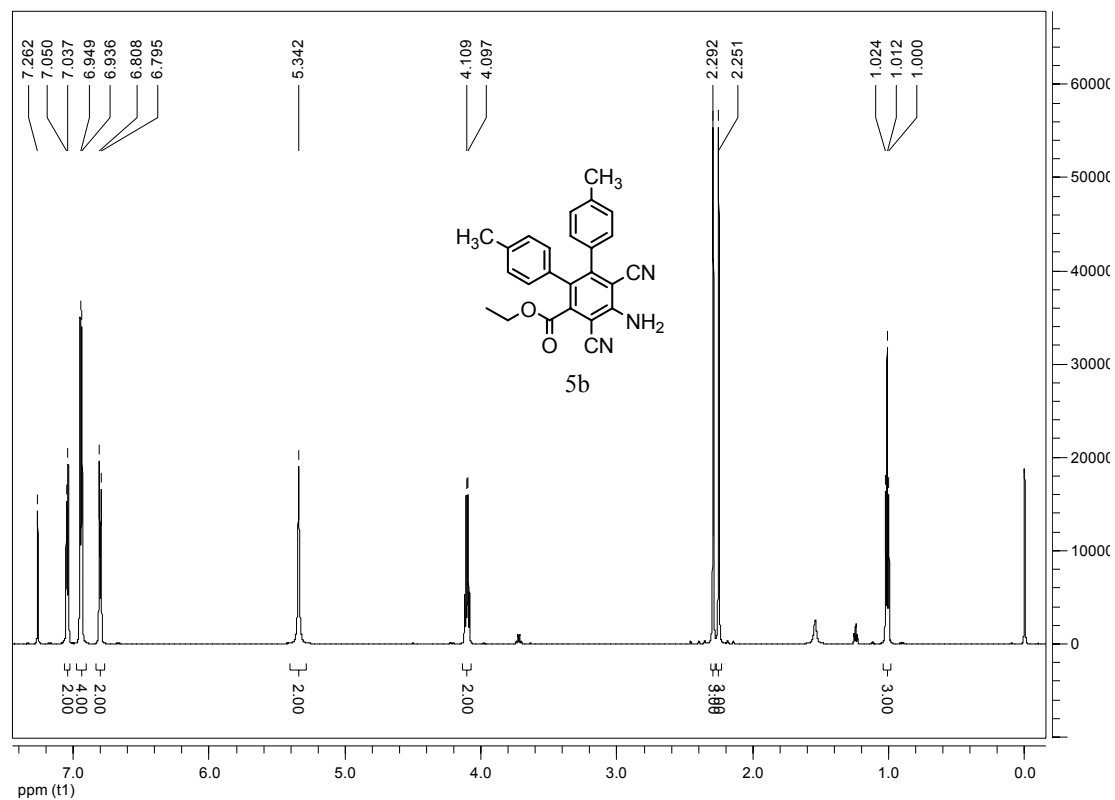

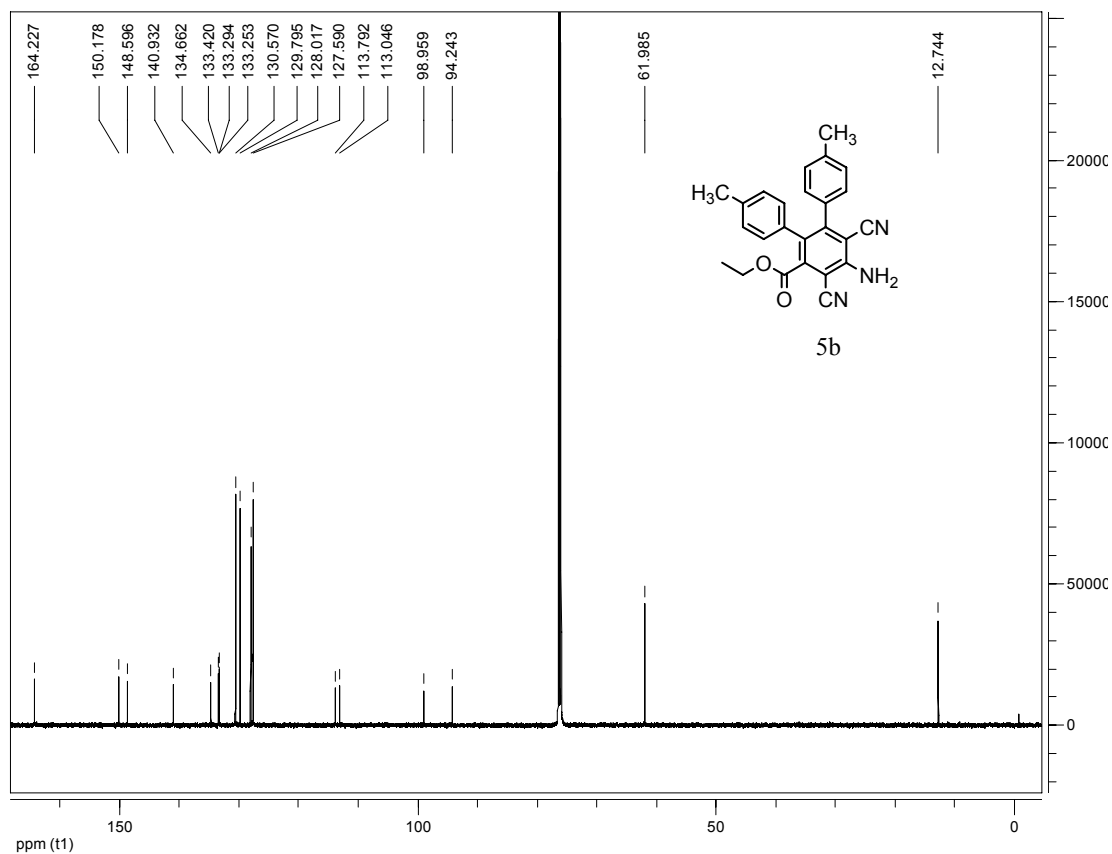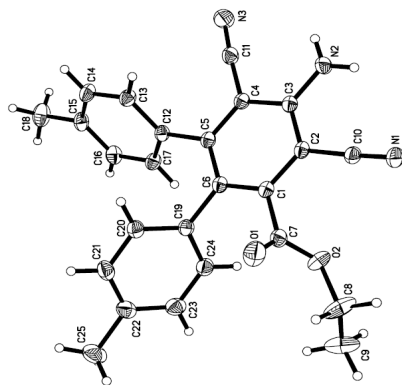

**Figure 2** X-ray crystallographic structure of **1b**

**1c** mp231~232°. <sup>1</sup>H NMR (CDCl<sub>3</sub>, 600 MHz) δ 7.257 (d, *J* = 7.8 Hz, 2H, *p*-ClC<sub>6</sub>H<sub>4</sub>), 7.156 (d, *J* = 8.4 Hz, 2H, *p*-ClC<sub>6</sub>H<sub>4</sub>), 6.990 (d, *J* = 7.8 Hz, 2H, *p*-ClC<sub>6</sub>H<sub>4</sub>), 6.860 (d, *J* = 8.4 Hz, 2H, *p*-ClC<sub>6</sub>H<sub>4</sub>), 5.423 (s, 2H, NH<sub>2</sub>), 4.129 (q, *J* = 7.2 Hz, 2H, CH<sub>2</sub>), 1.051 (t, *J* = 7.2 Hz, 3H, CH<sub>3</sub>); <sup>13</sup>C NMR (CDCl<sub>3</sub>, 600 MHz) δ(ppm) 162.84, 148.82, 147.13, 139.53, 132.40, 132.36, 129.63, 129.49, 129.21, 126.67, 125.19,



121.60, 120.25, 112.42, 111.67, 97.54, 92.93, 60.66, 11.37; IR(KBr)  $\nu$  3469, 3351, 3244, 2221, 1743, 1642, 1557, 1493, 1447, 1375, 1276, 1218, 1016, 789, 743; Found: C, 63.09; H, 3.22; N, 9.54.  $C_{23}H_{15}Cl_2N_3O_2$  requires C, 63.32; H, 3.47; N, 9.63. The structure of 5c was further proved by X-ray crystallographic analysis (Figure 3).

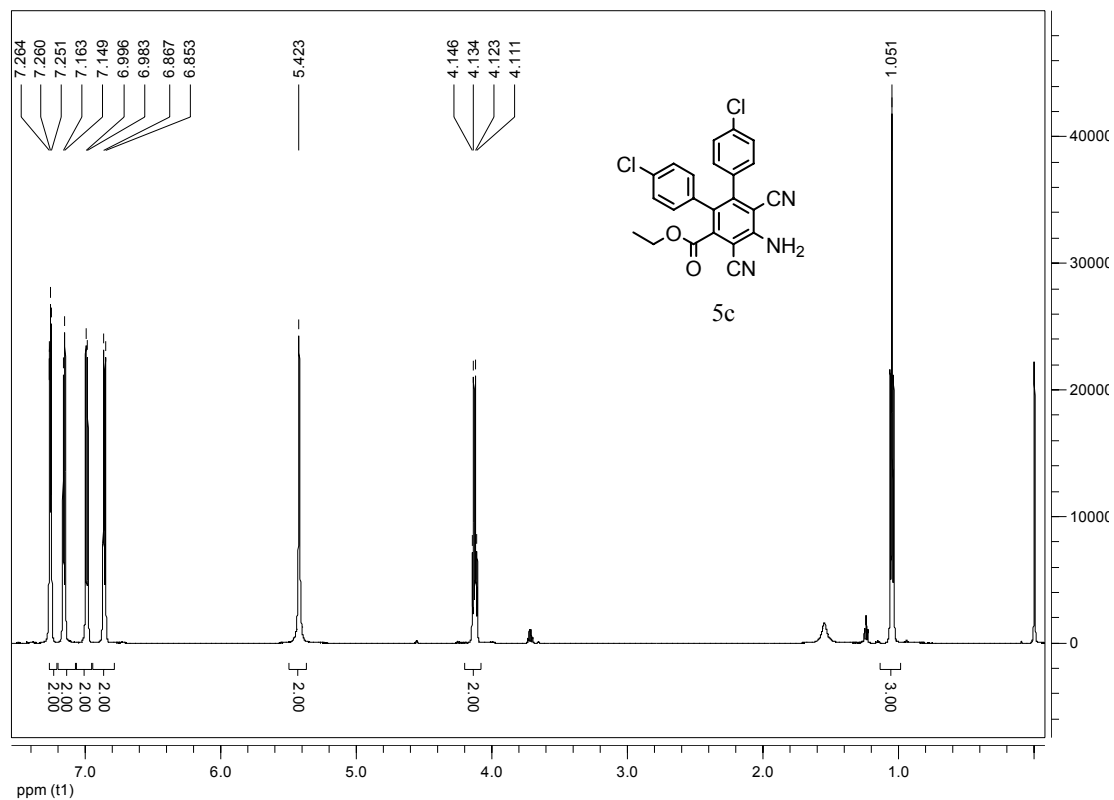

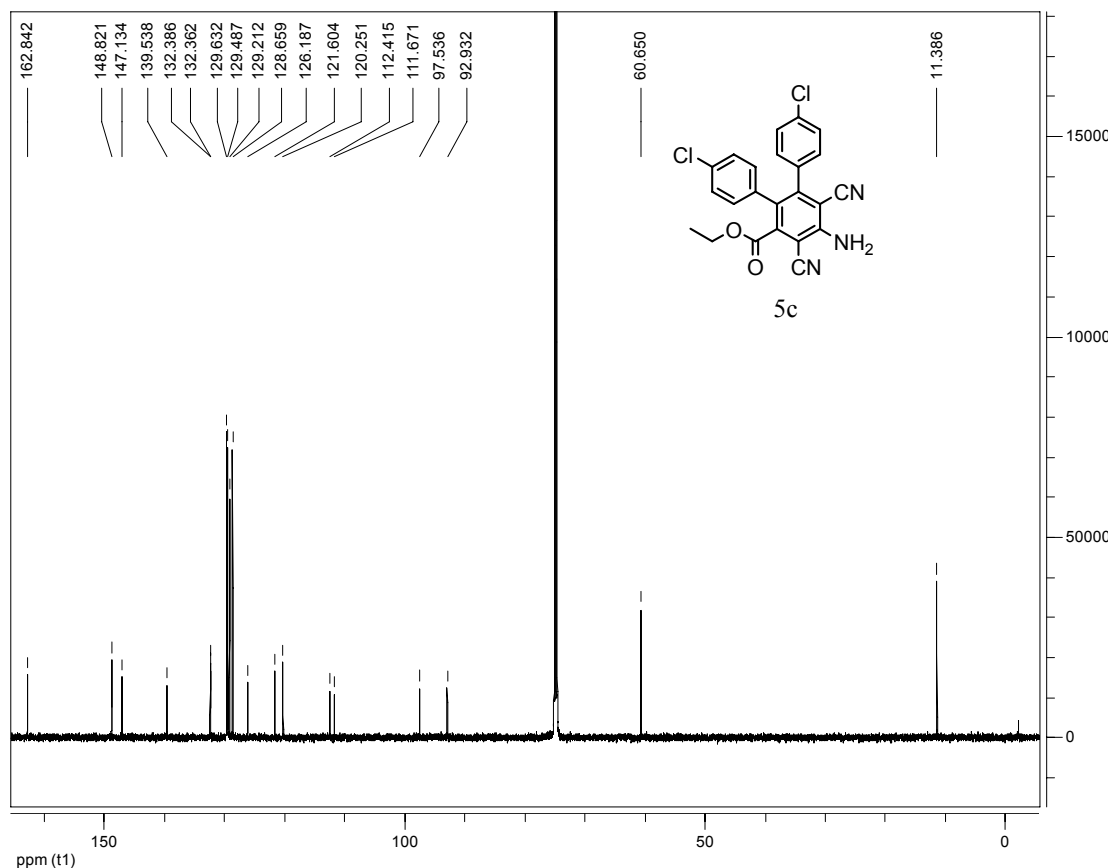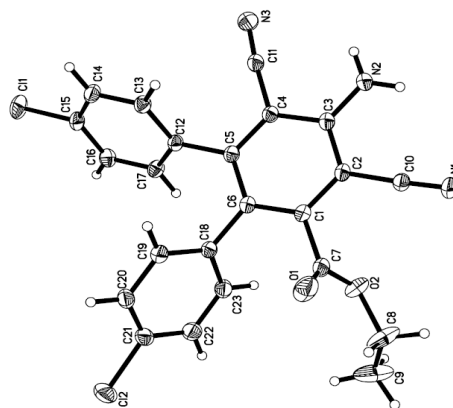

**Figure 3** X-ray crystallographic structure of **1c**

**1d** mp201~202 °C.  $^1\text{H}$  NMR (600MHz,  $\text{CDCl}_3$ )  $\delta$ (ppm) 7.27~7.25 (m, 1H, m- $\text{ClC}_6\text{H}_4$ ), 7.22~7.16 (m, 2H, m- $\text{ClC}_6\text{H}_4$ ), 7.10~7.04 (m, 2H, m- $\text{ClC}_6\text{H}_4$ ), 6.95 (s, 2H, m- $\text{ClC}_6\text{H}_4$ ), 6.78 (s, 1H, m- $\text{ClC}_6\text{H}_4$ ), 5.44 (s, 2H,  $\text{NH}_2$ ), 4.13 (q,  $J = 8.4\text{Hz}$ , 2H,  $\text{CH}_2$ ), 1.03 (t,  $J = 8.4\text{Hz}$ , 3H,  $\text{CH}_3$ ).  $^{13}\text{C}$  NMR (600MHz,  $\text{CDCl}_3$ )  $\delta$ (ppm) 150.9, 148.9, 137.1, 137.1, 134.4, 134.4, 129.9, 129.7, 129.3, 129.2, 128.3, 128.2, 127.4, 114.4, 113.8,

99.6, 62.8, 16.5.

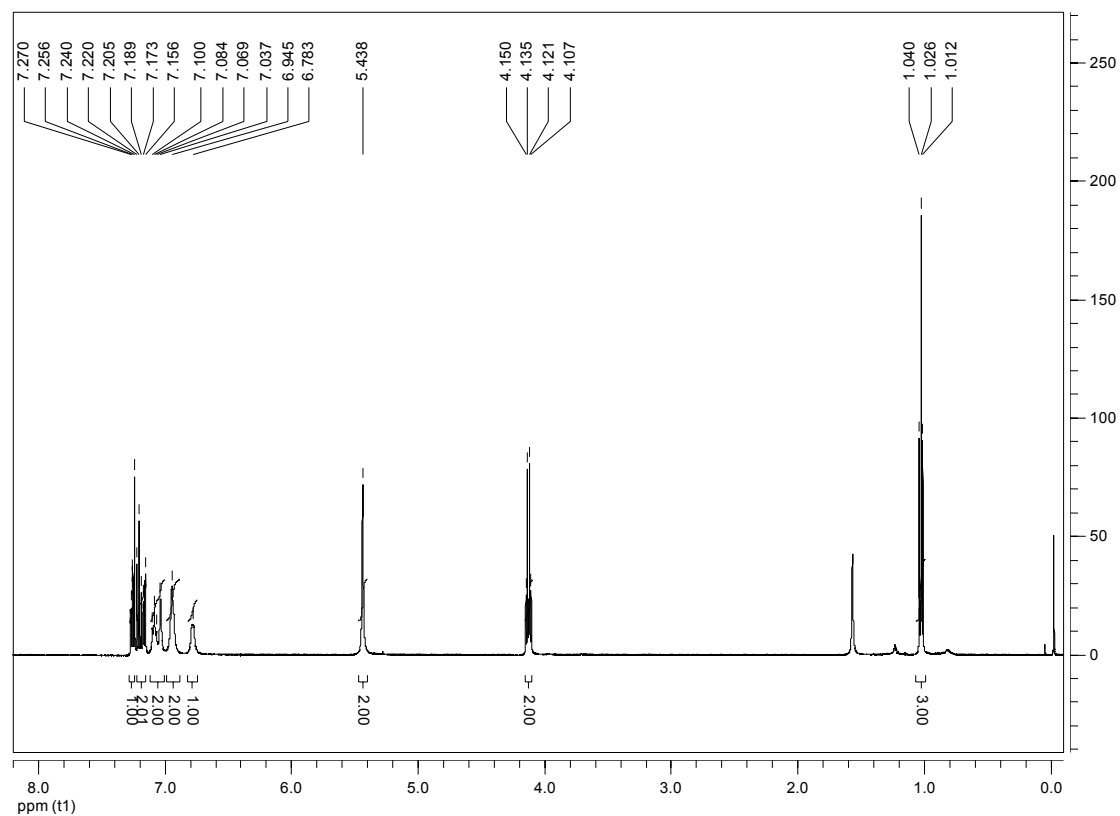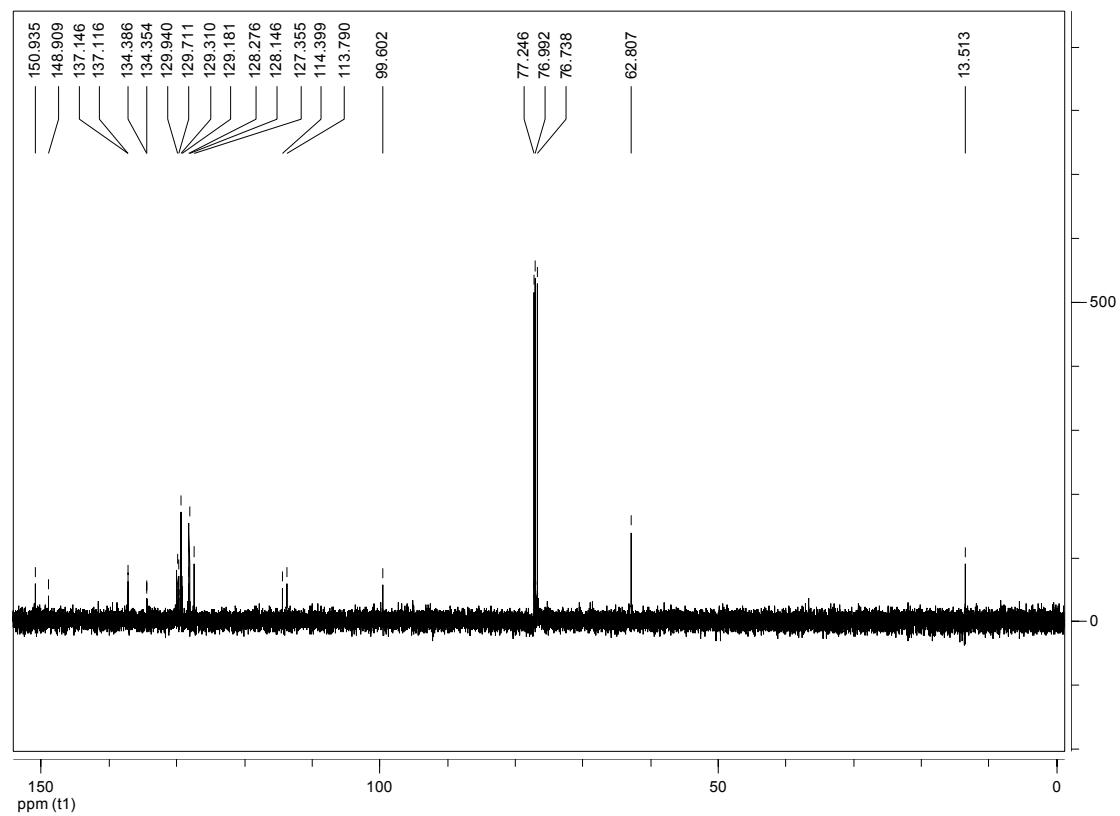

**1e** mp252~253°.  $^1\text{H}$  NMR ( $\text{CDCl}_3$ , 600 MHz)  $\delta$  7.419 (d,  $J = 8.4$  Hz, 2H,  $p\text{-BrC}_6\text{H}_4$ ), 7.315 (d,  $J = 8.4$  Hz, 2H,  $p\text{-BrC}_6\text{H}_4$ ), 6.926 (d,  $J = 8.4$  Hz, 2H,  $p\text{-BrC}_6\text{H}_4$ ), 6.797 (d,  $J = 8.4$  Hz, 2H,  $p\text{-BrC}_6\text{H}_4$ ), 5.423 (s, 2H,  $\text{NH}_2$ ), 4.129 (q,  $J = 7.2$  Hz, 2H,  $\text{CH}_2$ ), 1.052 (t,  $J = 7.2$  Hz, 3H,  $\text{CH}_3$ );  $^{13}\text{C}$  NMR ( $\text{CDCl}_3$ , 600 MHz)  $\delta$ (ppm) 163.31, 149.48, 147.33, 140.08, 135.93, 131.43, 130.72, 129.57, 128.39, 127.97, 127.26, 125.61, 125.30, 120.85, 120.50, 112.85, 112.25, 96.16, 93.67, 61.30, 12.03; IR(KBr)  $\nu$  3469, 3352, 3243, 2221, 1742, 1639, 1558, 1445, 1376, 1305, 1262, 1219, 1025, 785, 734; Found: C,52.49; H,2.68; N,7.87.  $\text{C}_{23}\text{H}_{15}\text{Br}_2\text{N}_3\text{O}_2$  requires C,52.60; H,2.88; N,8.00.

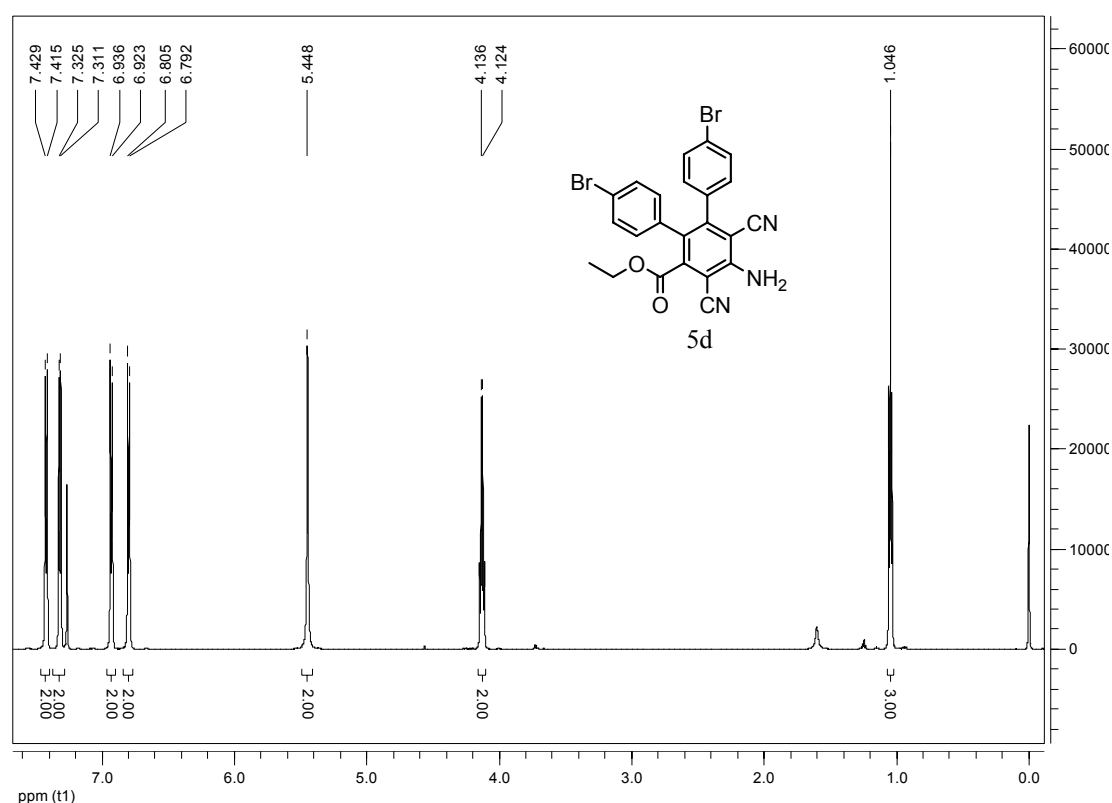

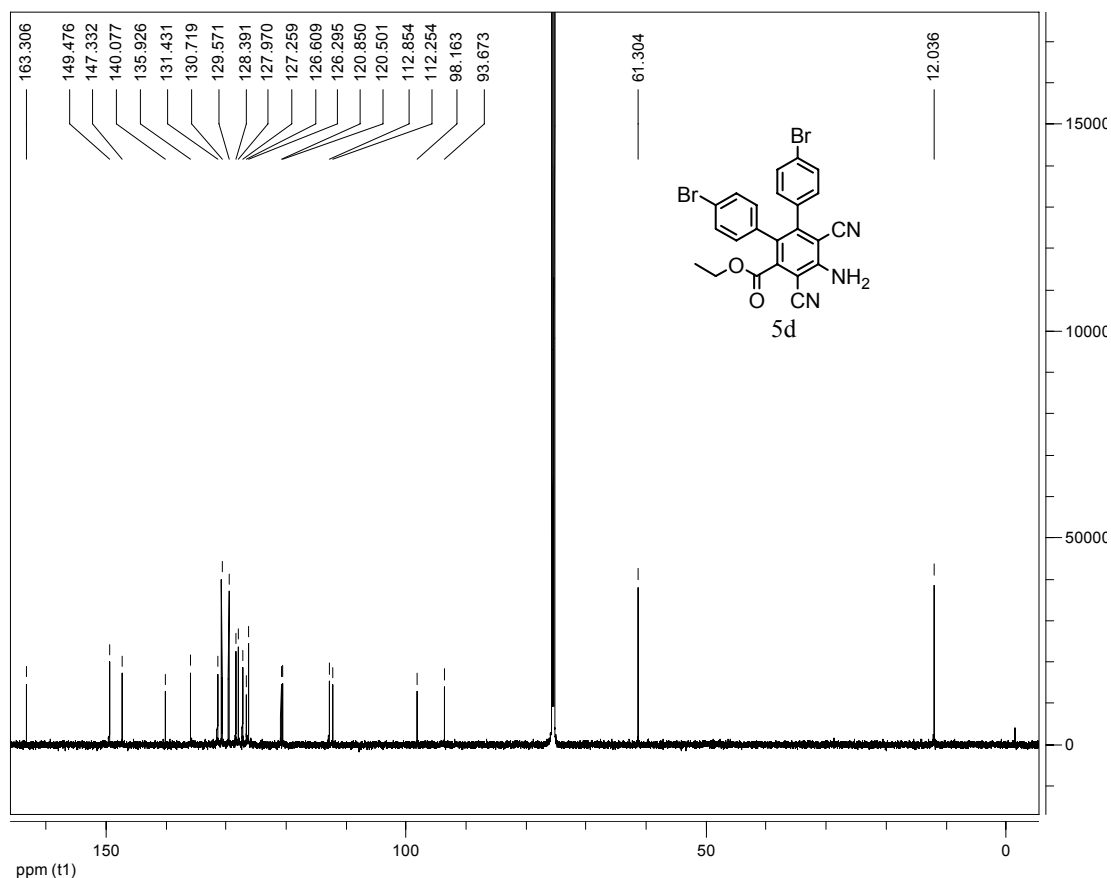

**1f** mp187~188°. <sup>1</sup>H NMR (CDCl<sub>3</sub>, 600 MHz) δ 7.437 (d, J = 8.4 Hz, 1H, m-BrC<sub>6</sub>H<sub>4</sub>), 7.340 (d, J = 7.2 Hz, 1H, m-BrC<sub>6</sub>H<sub>4</sub>), 7.214 (s, 1H, m-BrC<sub>6</sub>H<sub>4</sub>), 7.163 (q, J = 7.8 Hz, 2H, m-BrC<sub>6</sub>H<sub>4</sub>), 7.028 (q, J = 7.8 Hz, 2H, m-BrC<sub>6</sub>H<sub>4</sub>), 6.846 (s, 1H, m-BrC<sub>6</sub>H<sub>4</sub>), 5.450 (s, 2H, NH<sub>2</sub>), 4.154 (q, J = 7.2 Hz, 2H, CH<sub>2</sub>), 1.060 (t, J = 7.2 Hz, 3H, CH<sub>3</sub>); <sup>13</sup>C NMR (CDCl<sub>3</sub>, 600 MHz) δ(ppm) 165.05, 150.55, 150.15, 141.18, 138.22, 136.81, 132.53, 132.40, 129.40, 126.69, 126.36, 126.06, 114.63, 113.73, 99.42, 93.70, 61.91, 20.75, 20.61, 12.97; IR(KBr) ν 3464, 3348, 3238, 2223, 1728, 1636, 1563, 1448, 1384, 1275, 1232, 1029, 775, 682; Found: C,52.47; H,2.68; N,7.87. C<sub>23</sub>H<sub>15</sub>Br<sub>2</sub>N<sub>3</sub>O<sub>2</sub> requires C,52.60; H,2.88; N,8.00.

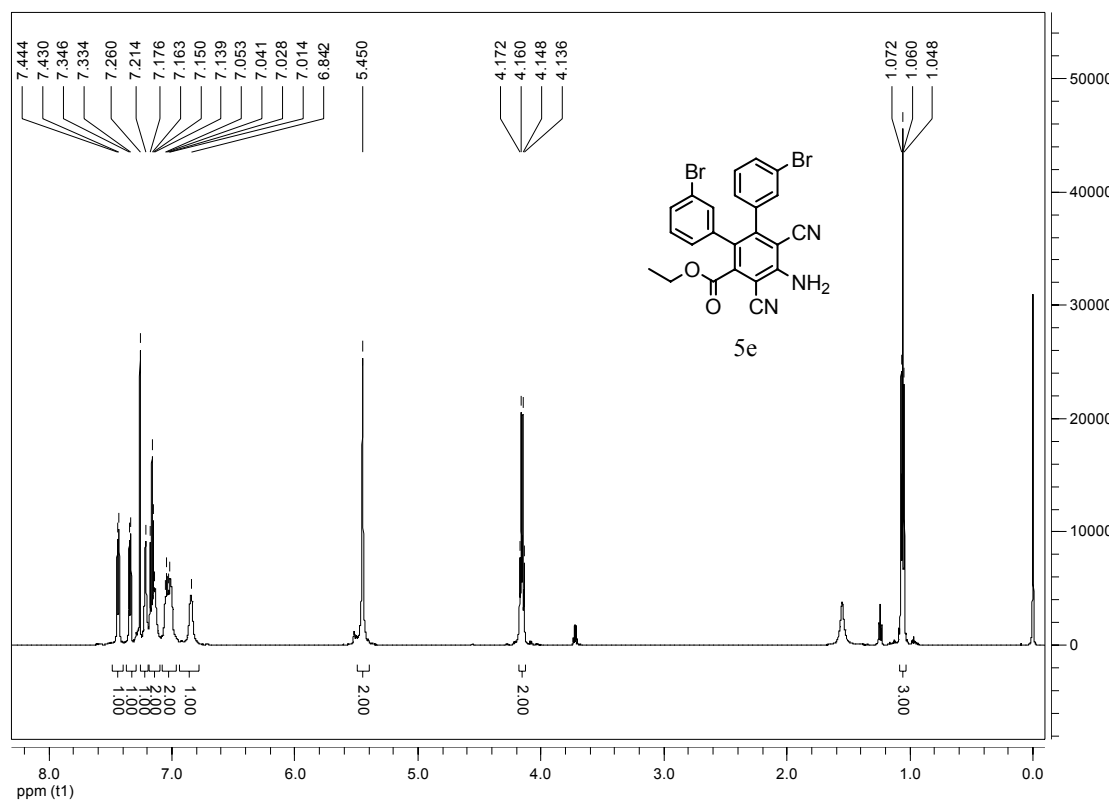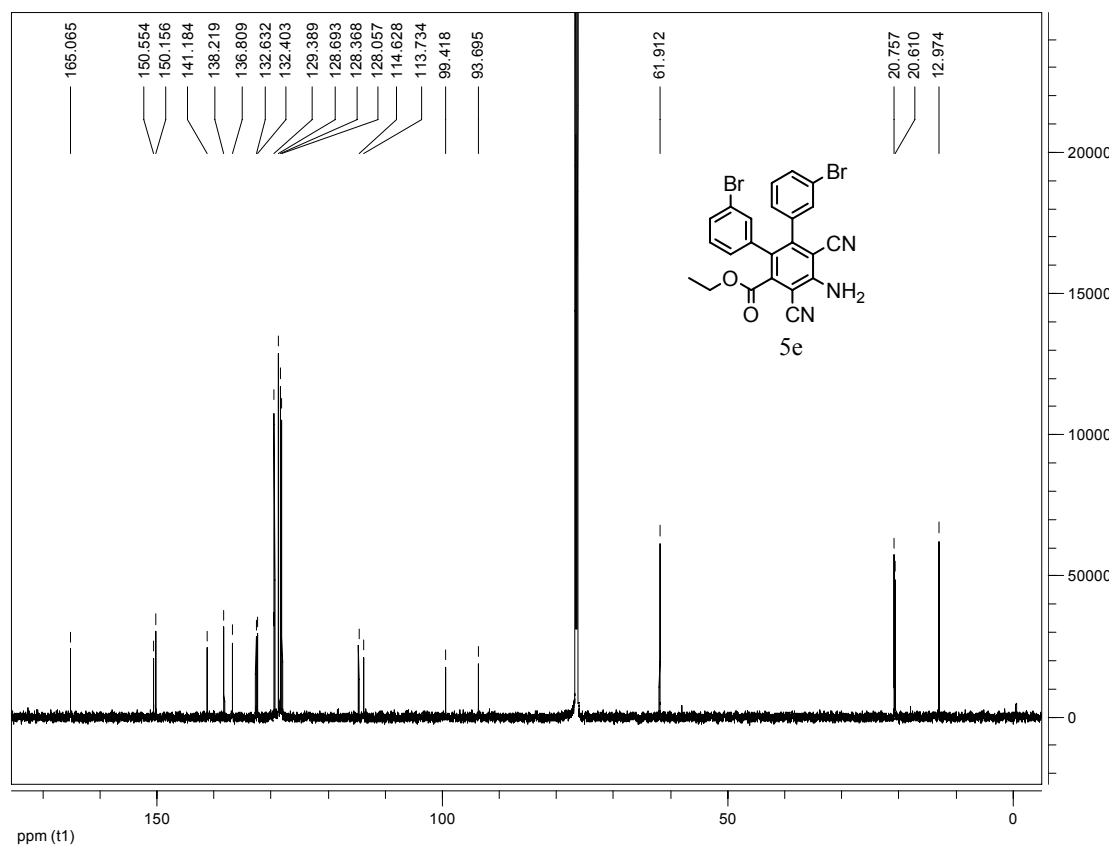

**1g** mp171~172°C. <sup>1</sup>H NMR (600MHz, CDCl<sub>3</sub>) δ(ppm) 7.52 (d, *J* = 9.6Hz, 1H, *o*-BrC<sub>6</sub>H<sub>4</sub>), 7.39 (d, *J* = 8.4Hz, 1H, *o*-BrC<sub>6</sub>H<sub>4</sub>), 7.16~7.10 (m, 3H, *o*-BrC<sub>6</sub>H<sub>4</sub>),

7.06~6.99 (m, 3H, *o*-BrC<sub>6</sub>H<sub>4</sub>), 5.48 (s, 2H, NH<sub>2</sub>), 4.10 (q, *J* = 8.4Hz, 2H, CH<sub>2</sub>), 0.99 (t, *J* = 8.4Hz, 3H, CH<sub>3</sub>). <sup>13</sup>CNMR (600MHz, CDCl<sub>3</sub>) δ(ppm) 164.4, 150.9, 149.2, 140.9, 136.0, 135.8, 133.4, 133.1, 132.6, 131.6, 130.5, 129.5, 129.4, 126.5, 126.1, 124.5, 123.0, 114.4, 114.2, 101.2, 95.9, 62.6, 13.3 . C<sub>23</sub>H<sub>15</sub>Br<sub>2</sub>N<sub>3</sub>O<sub>2</sub> (M<sub>w</sub>= 525.19, M<sup>+</sup> = 525.95)

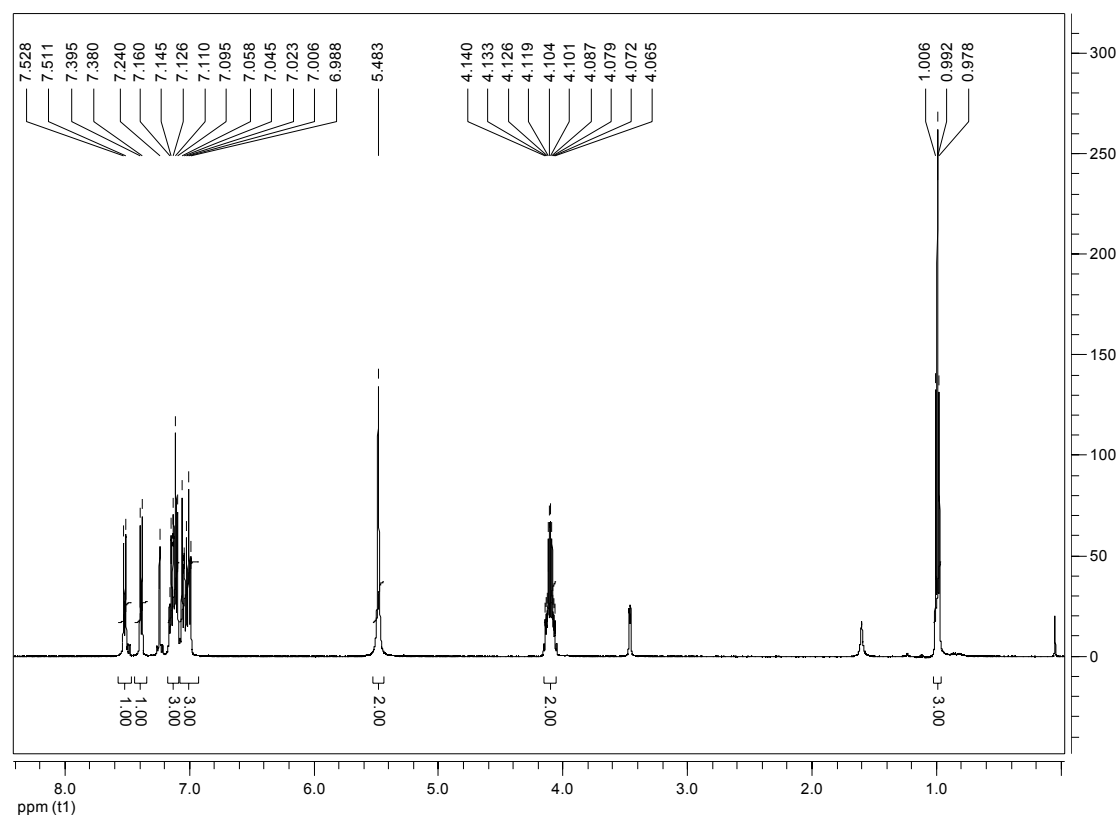

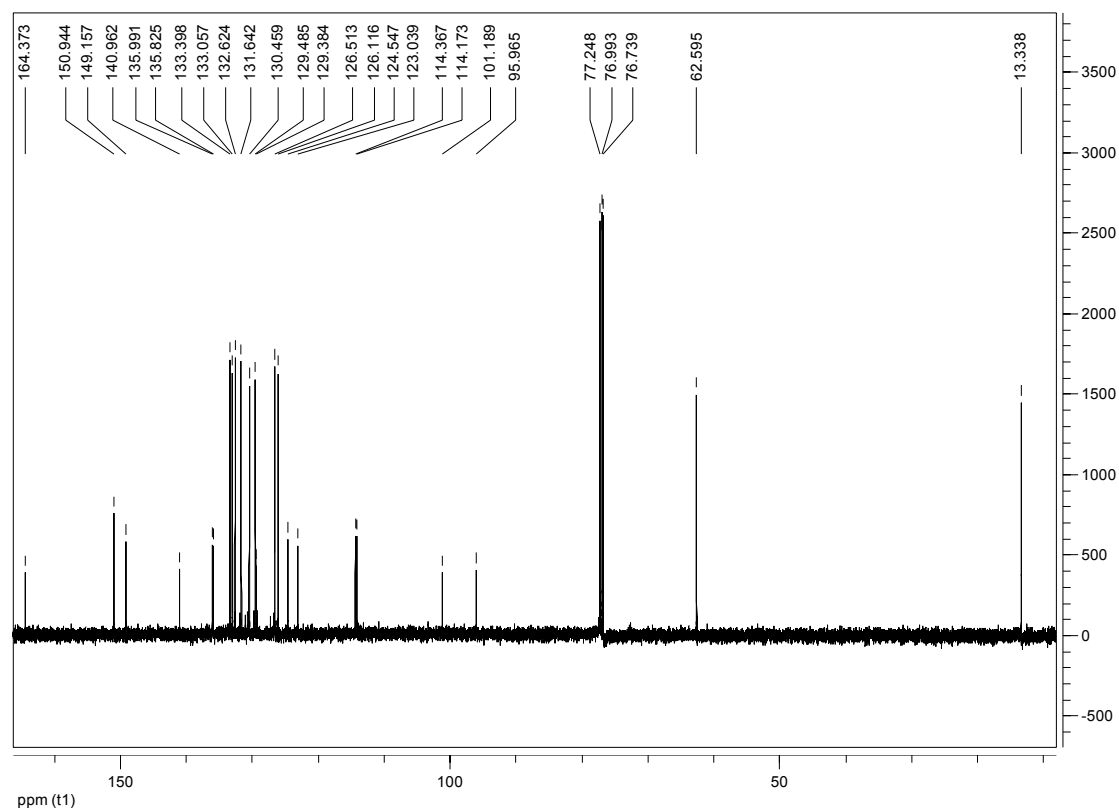

**1h** mp187-188°C.  $^1\text{H}$  NMR (600MHz,  $\text{CDCl}_3$ )  $\delta$ (ppm) 7.25 (d,  $J = 9.6\text{Hz}$ , 2H,  $p$ -( $\text{CH}_3$ ) $_3\text{CC}_6\text{H}_4$ ), 7.16 (d,  $J = 8.4\text{Hz}$ , 2H,  $p$ -( $\text{CH}_3$ ) $_3\text{CC}_6\text{H}_4$ ), 6.99 (d,  $J = 9.6\text{Hz}$ , 2H,  $p$ -( $\text{CH}_3$ ) $_3\text{CC}_6\text{H}_4$ ), 6.84 (d,  $J = 9.6\text{Hz}$ , 2H,  $p$ -( $\text{CH}_3$ ) $_3\text{CC}_6\text{H}_4$ ), 5.44 (s, 2H,  $\text{NH}_2$ ), 4.13 (q,  $J = 8.4\text{Hz}$ , 2H,  $\text{CH}_2$ ), 1.28 (s, 9H,  $(\text{CH}_3)_3\text{C}$ ), 1.25 (s, 9H,  $(\text{CH}_3)_3\text{C}$ ), 0.95 (t,  $J = 8.4\text{Hz}$ , 3H,  $\text{CH}_3$ ).  $^{13}\text{C}$  NMR (600MHz,  $\text{CDCl}_3$ )  $\delta$ (ppm) 165.7, 151.7, 151.2, 150.5, 141.3, 132.9, 129.6, 129.0, 124.3, 124.5, 115.2, 114.3, 99.5, 93.9, 62.3, 34.5, 34.4, 31.1, 31.1, 13.3.  $\text{C}_{31}\text{H}_{33}\text{N}_3\text{O}_2$  ( $M_w = 479.26$ ,  $M^+ = 479.61$ )



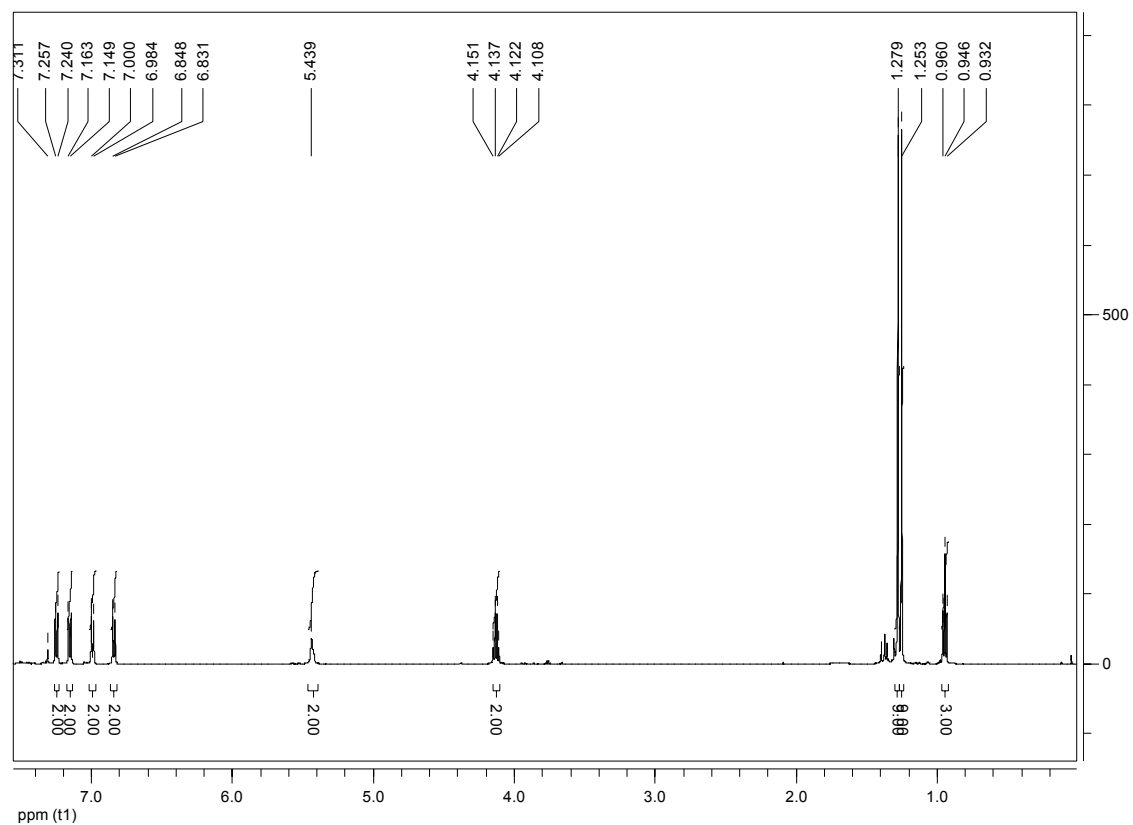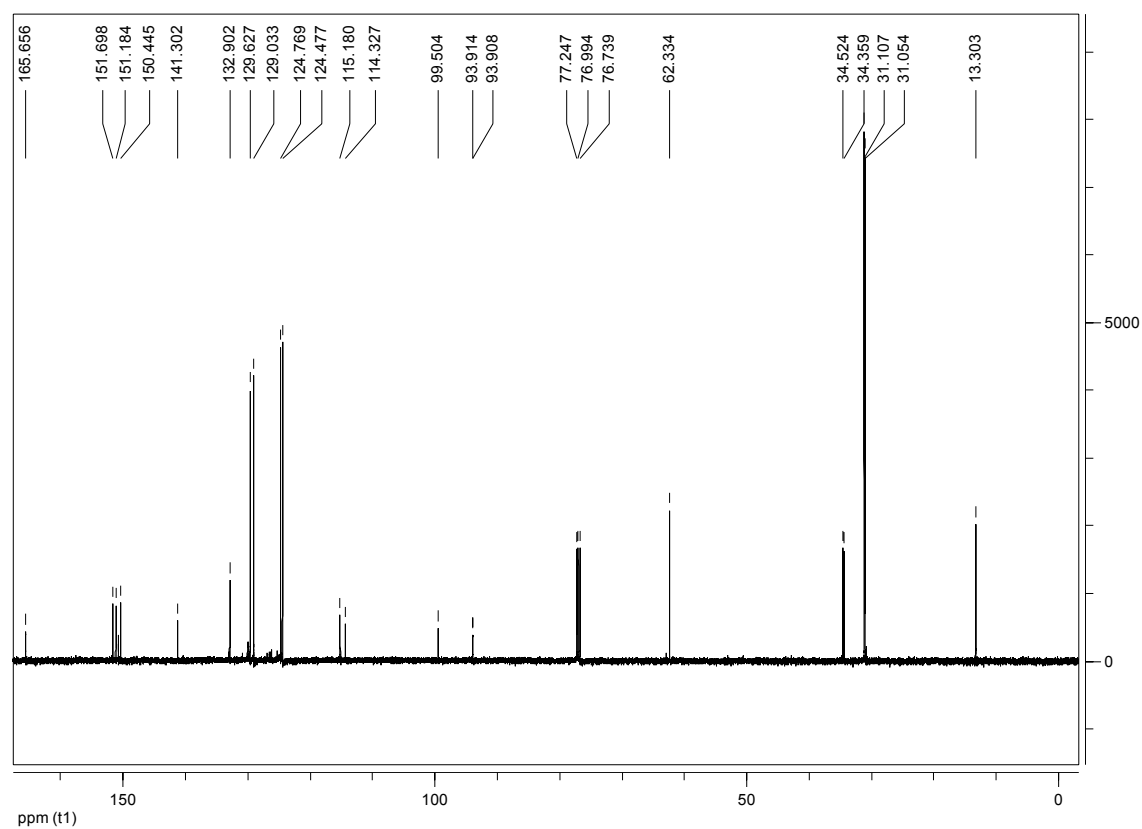

**F** (Ar = *p*-(CH<sub>3</sub>)<sub>3</sub>CC<sub>6</sub>H<sub>4</sub>) Yield: 22%; Mp: 180-182. <sup>1</sup>H NMR (600MHz, CDCl<sub>3</sub>) δ(ppm) 7.39 (d, *J* = 9.6Hz, 2H, *p*-(CH<sub>3</sub>)<sub>3</sub>CC<sub>6</sub>H<sub>4</sub>), 7.26 (t, *J* = 8.4Hz, 4H, *p*-(CH<sub>3</sub>)<sub>3</sub>CC<sub>6</sub>H<sub>4</sub>), 6.97

(d,  $J = 9.6\text{Hz}$ , 2H,  $p\text{-(CH}_3)_3\text{CC}_6\text{H}_4$ ), 5.47 (s, 2H,  $\text{NH}_2$ ), 4.31 (s, 1H, CH), 4.07 (q,  $J = 7.2\text{Hz}$ , 2H,  $\text{CH}_2$ ), 1.29 (s, 9H,  $(\text{CH}_3)_3\text{C}$ ), 1.24 (s, 9H,  $(\text{CH}_3)_3\text{C}$ ), 0.91 (t,  $J = 8.4\text{Hz}$ , 3H,  $\text{CH}_3$ ).  $^{13}\text{C}$  NMR (600MHz,  $\text{CDCl}_3$ )  $\delta(\text{ppm})$  165.1, 153.4, 151.9, 142.3, 134.7, 133.5, 129.1, 126.9, 126.5, 125.7, 125.3, 124.9, 115.0, 111.9, 110.7, 80.2, 61.8, 53.1, 42.4, 34.7, 31.1, 13.3.  $\text{C}_{32}\text{H}_{34}\text{N}_4\text{O}_2$  (Mw = 506.65,  $\text{M}^+ = 507.27$ )

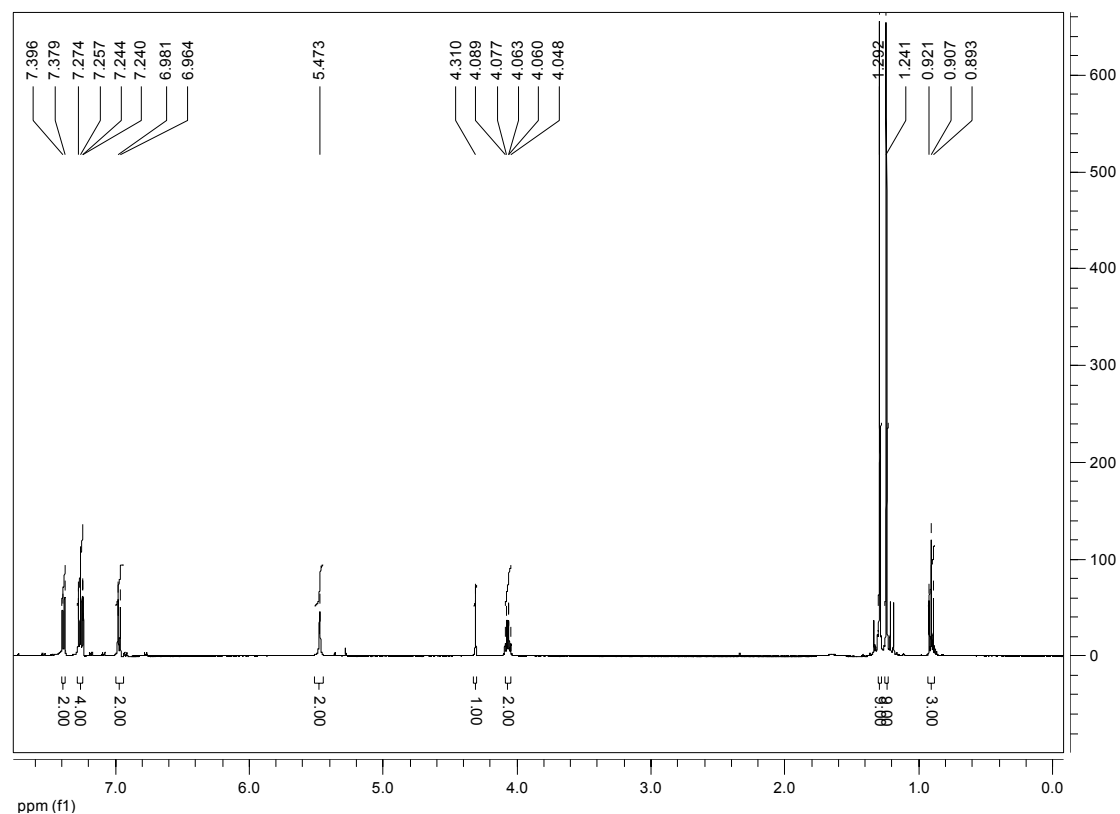

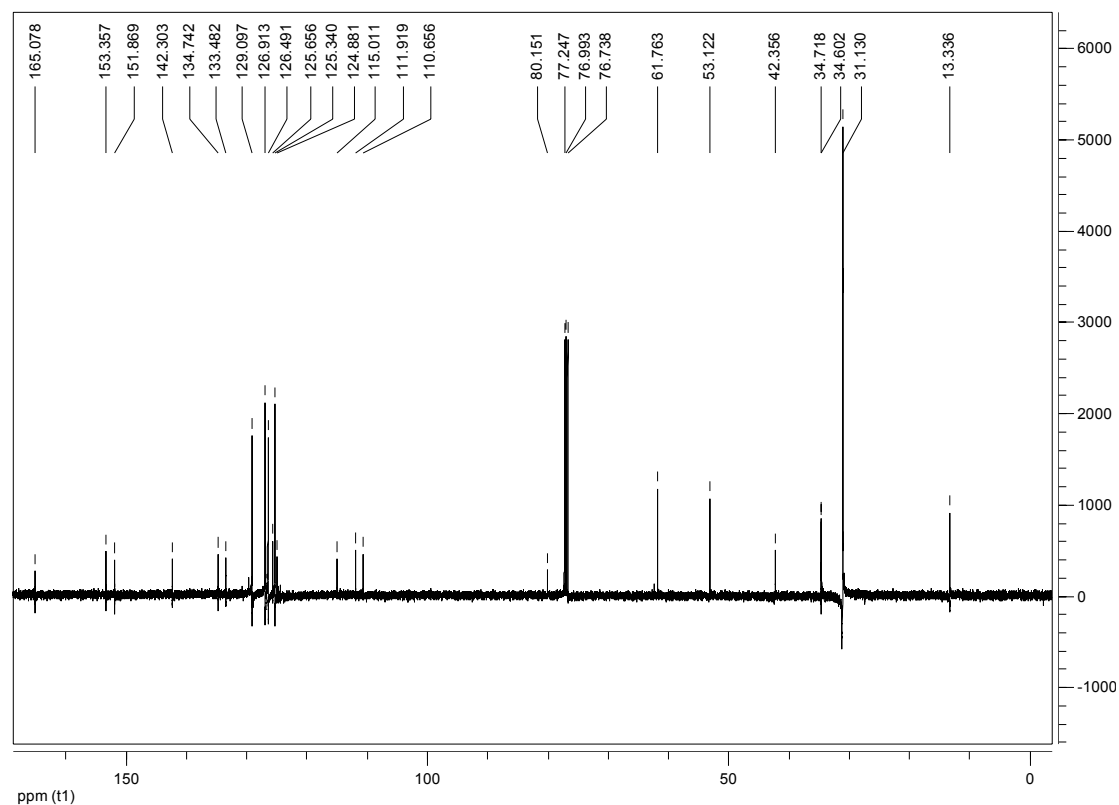

### General procedure for the synthesis of cyclopropane derivatives

A mixture of pyridine (20.0mmol, 1.58g), ethyl  $\alpha$ -bromoacetate (5.0mmol, 0.835g), aromatic aldehyde (5.0mmol), malononitrile (5.0mmol, 0.330g) and triethylamine (1.0mL) in acetonitrile (20mL) was refluxed for 12 hours. The solvent was removed by evaporation and the residue was titrated with ethanol (10mL) to give the crude product, which is recrystallized in ethanol to give light yellow solid **D**

**D1** (Ar = *p*-ClC<sub>6</sub>H<sub>4</sub>): yield 84.8%, mp: 175~176 °C. <sup>1</sup>H NMR (600MHz, CDCl<sub>3</sub>)  $\delta$  (ppm) 7.43 (d, *J* = 8.4Hz, 2H, C<sub>6</sub>H<sub>4</sub>), 7.26 (d, *J* = 8.4Hz, 2H, C<sub>6</sub>H<sub>4</sub>), 4.71 (q, *J* = 7.2Hz, 2H, CH<sub>2</sub>), 3.66 (d, *J* = 7.2Hz, 1H, CH), 3.11 (d, *J* = 7.2Hz, 1H, CH), 1.39 (t, *J* = 7.2Hz, 3H, CH<sub>3</sub>).

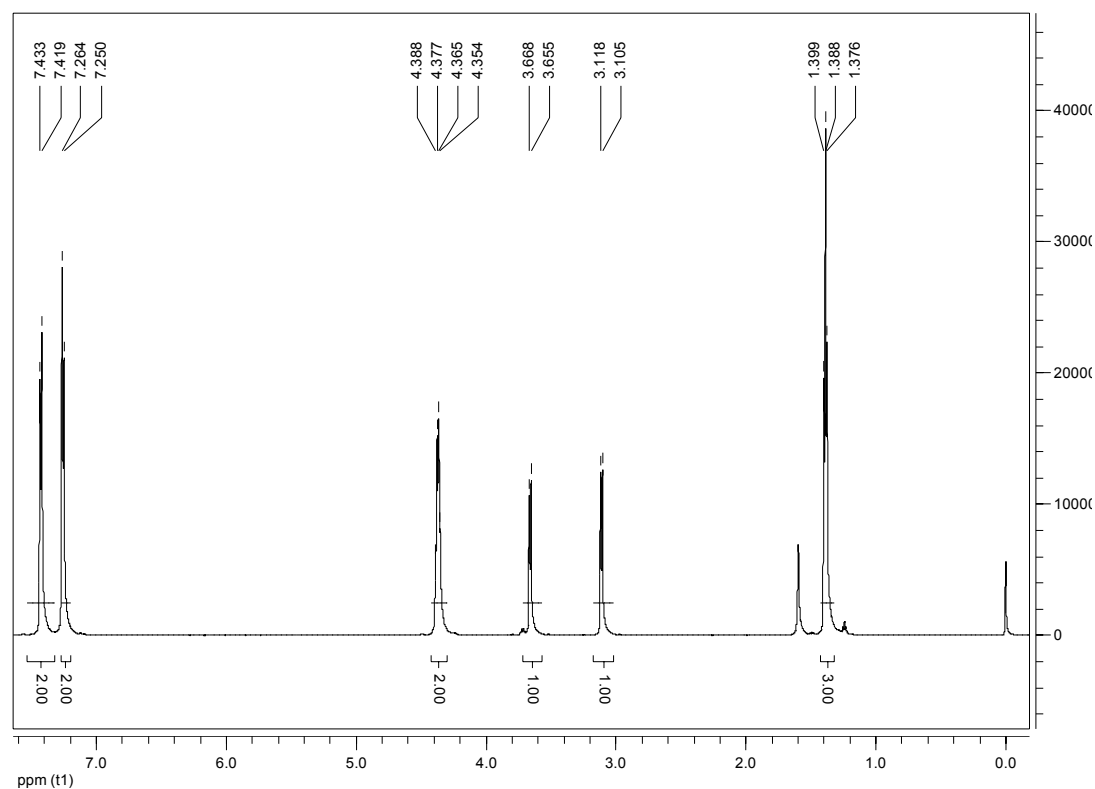

**D2** (Ar = *o*-BrC<sub>6</sub>H<sub>4</sub>): yield: 75.2% mp: 191-193 °C. <sup>1</sup>H NMR (600MHz, CDCl<sub>3</sub>) δ(ppm) 7.77 (d, *J* = 9.6Hz, 1H, *o*-BrC<sub>6</sub>H<sub>4</sub>), 7.44~7.36 (m, 2H, *o*-BrC<sub>6</sub>H<sub>4</sub>), 7.23 (d, *J* = 8.4Hz, 1H, *o*-BrC<sub>6</sub>H<sub>4</sub>), 4.43 (q, *J* = 8.4Hz, 2H, CH<sub>2</sub>), 3.74 (d, *J* = 7.2Hz, 1H, CH), 3.17 (d, *J* = 9.6Hz, 1H, CH), 1.44 (t, *J* = 8.4Hz, 3H, CH<sub>3</sub>). <sup>13</sup>C NMR (600MHz, CDCl<sub>3</sub>) δ(ppm) 164.5, 133.5, 133.5, 131.3, 131.3, 129.6, 129.6, 129.3, 129.3, 127.9, 127.9, 126.2, 126.207, 111.5, 111.3, 63.4, 39.2, 34.5, 14.0. C<sub>14</sub>H<sub>11</sub>BrN<sub>2</sub>O<sub>2</sub> (M<sup>+</sup> 318.93, 320.93)

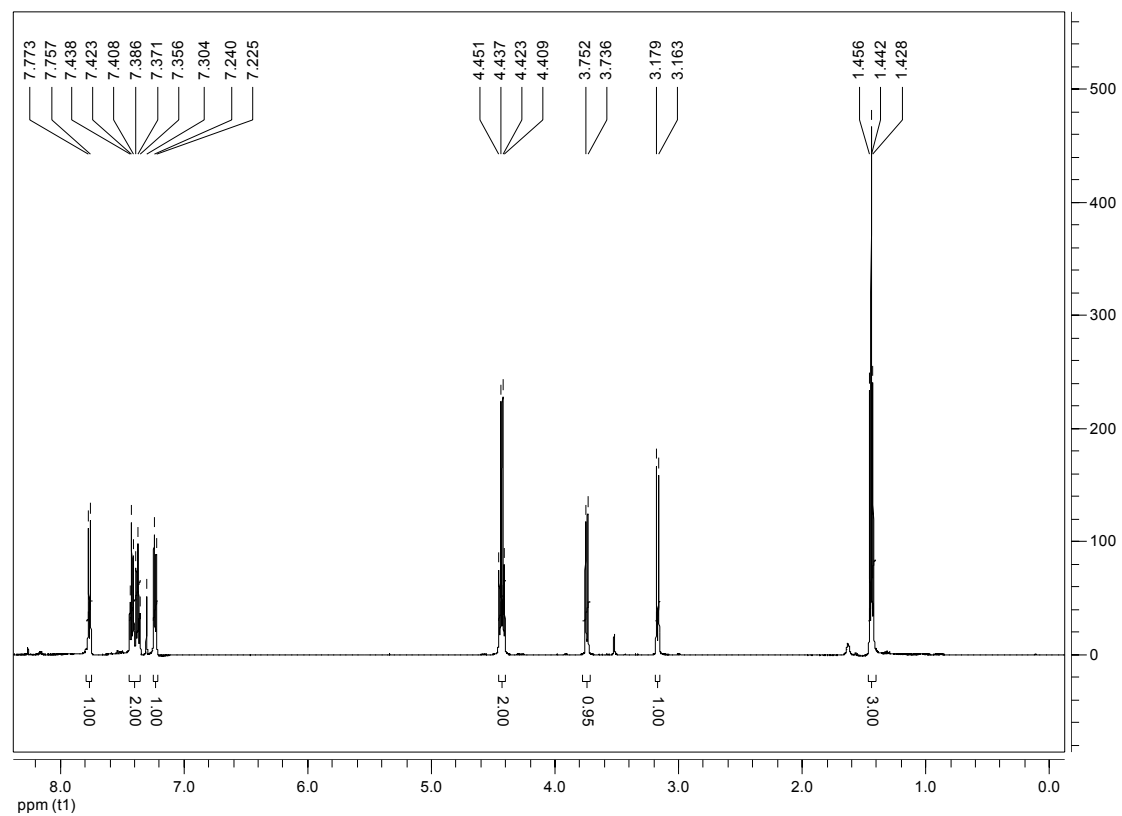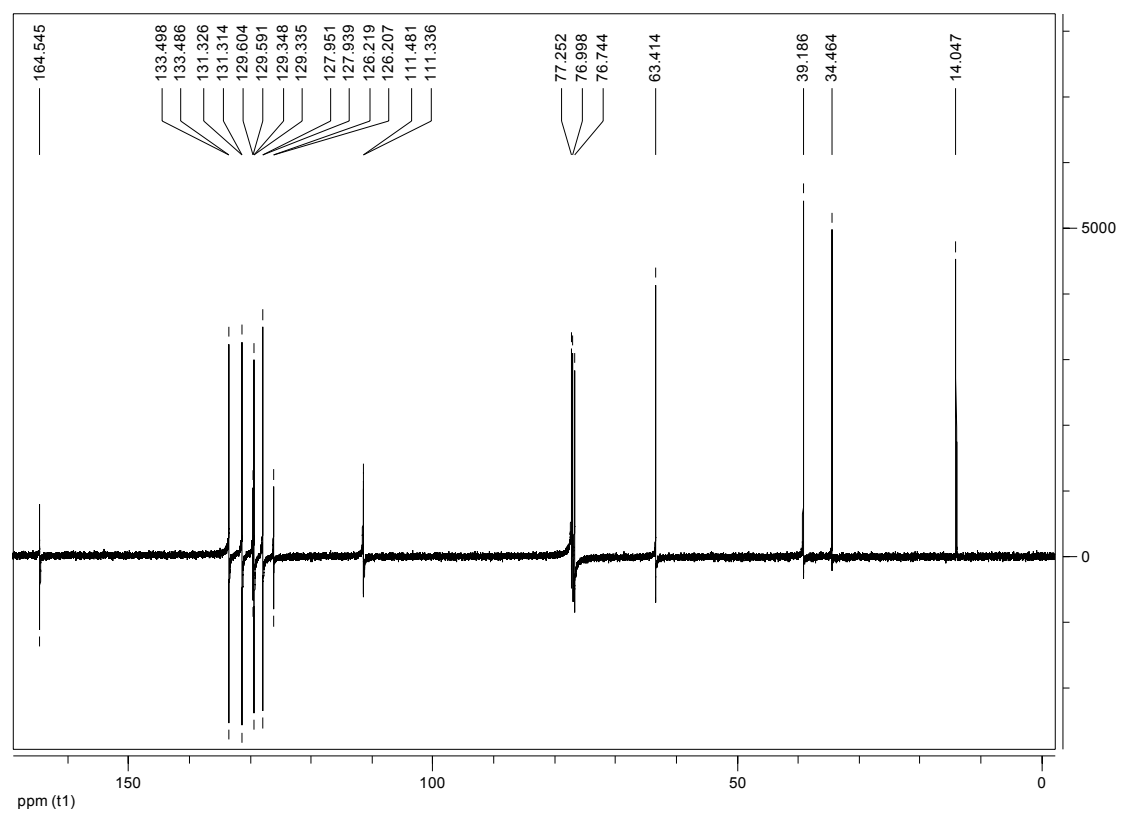

Supplement: b718171j.pdf [file b718171j.pdf]
